# Supplementary material
Source: publisher figshare collection journal article supplement (https://future-science-group.figshare.com/ndownloader/files/34144671)
Supplement: Supplementary file 1 [file 34144671]

**Supplemental Material**

Table S1- Means and standard deviation of CFU/mL values for tissue conditioner CC in different experimental conditions.

| **Treatment** | **Strain** | **Period** | **CFU/mL** |
| --- | --- | --- | --- |
| CC | SC | 24 h | 21200000±7615773 |
| Pri | SC | 24 h | 1405689±1554485 |
| EG | SC | 24 h | 28356±32810 |
| PG | SC | 24 h | 18244±10795 |
| Nys | SC | 24 h | 0 |
| CC | ATCC | 24 h | 1035556±3797075 |
| Pri | ATCC | 24 h | 77911±129317 |
| EG | ATCC | 24 h | 11978±14890 |
| PG | ATCC | 24 h | 5867±5783 |
| Nys | ATCC | 24 h | 0 |
| CC | SC | 7 d | 13066667 ±3098387 |
| Pri | SC | 7 d | 8715556±11995123 |
| EG | SC | 7 d | 129689±124458 |
| PG | SC | 7 d | 438667 ±482771 |
| Nys | SC | 7 d | 0 |
| CC | ATCC | 7 d | 10088889±2364553 |
| Pri | ATCC | 7 d | 3035556±3086451 |
| EG | ATCC | 7 d | 89733±12837 |
| PG | ATCC | 7 d | 1778 ±1909 |
| Nys | ATCC | 7 d | 0 |
| CC | SC | 14 d | 4444444 ±581187 |
| Pri | SC | 14 d | 7822222±2669165 |
| EG | SC | 14 d | 382222±492386 |
| PG | SC | 14 d | 1822222 ±2750354 |
| Nys | SC | 14 d | 0 |
| CC | ATCC | 14 d | 569778 ±400146 |
| Pri | ATCC | 14 d | 10311111±8887694 |
| EG | ATCC | 14 d | 1378±2192 |
| PG | ATCC | 14 d | 20444 ±32951 |
| Nys | ATCC | 14 d | 0 |

CC= CC material only (without primeror drug); Pri= primer only(without material or drug)*;* EG= *E. giganteum*; PG= *P. granatum*; Nys= Nystatin

Table S2- Means and standard deviation of CFU/mL values for temporary resiliente liner CS in different experimental conditions.

| **Treatment** | **Strain** | **Period** | **CFU/mL** |
| --- | --- | --- | --- |
| CS | SC | 24 h | 9022222 ±1981021 |
| Pri | SC | 24 h | 1265644±1854560 |
| EG | SC | 24 h | 178689±317835 |
| PG | SC | 24 h | 51733±39742 |
| Nys | SC | 24 h | 0 |
| CS | ATCC | 24 h | 7155556±2549074 |
| Pri | ATCC | 24 h | 30133±37352 |
| EG | ATCC | 24 h | 13333±21045 |
| PG | ATCC | 24 h | 11022±13884 |
| Nys | ATCC | 24 h | 0 |
| CS | SC | 7 d | 17244444±3209015 |
| Pri | SC | 7 d | 9955556±7925741 |
| EG | SC | 7 d | 485911±551529 |
| PG | SC | 7 d | 811733±924712 |
| Nys | SC | 7 d | 40711±48763 |
| CS | ATCC | 7 d | 12444444 ±2204037 |
| Pri | ATCC | 7 d | 2666667±2161296 |
| EG | ATCC | 7 d | 162667±248630 |
| PG | ATCC | 7 d | 8000±19601 |
| Nys | ATCC | 7 d | 1511±2567 |
| CS | SC | 14 d | 6235556±3334033 |
| Pri | SC | 14 d | 13600000±13495184 |
| EG | SC | 14 d | 625244±938229 |
| PG | SC | 14 d | 844±1760 |
| Nys | SC | 14 d | 133±283 |
| CS | ATCC | 14 d | 2497778 ±190904 |
| Pri | ATCC | 14 d | 4306667±1590723 |
| EG | ATCC | 14 d | 195778±384292 |
| PG | ATCC | 14 d | 213333±524976 |
| Nys | ATCC | 14 d | 0 |

CS= CS material only (without primeror drug); Pri= primer only(without material or drug)*;* EG= *E. giganteum*; PG= *P. granatum*; Nys= Nystatin

Table S3- Means and standard deviation of CFU/mL values for primer tested without soft material in different experimental conditions.

| **Treatment** | **Strain** | **Period** | **CFU/mL** |
| --- | --- | --- | --- |
| Pri | SC | 24 h | 34533333±4395452 |
| EG | SC | 24 h | 5200000 ±1296148 |
| PG | SC | 24 h | 7644444 ±1793817 |
| Nys | SC | 24 h | 1067 ±748 |
| Pri | ATCC | 24 h | 29688889±5458123 |
| EG | ATCC | 24 h | 4577778±1115547 |
| PG | ATCC | 24 h | 4977778±802773 |
| Nys | ATCC | 24 h | 1156 ±882 |
| Pri | SC | 7 d | 43111111 ±2414769 |
| EG | SC | 7 d | 7333±1483 |
| PG | SC | 7 d | 8711±1353 |
| Nys | SC | 7 d | 222 ±291 |
| Pri | ATCC | 7 d | 37733333±1989975 |
| EG | ATCC | 7 d | 7200 ±1960 |
| PG | ATCC | 7 d | 9067 ±1400 |
| Nys | ATCC | 7 d | 44 ±133 |
| Pri | SC | 14 d | 34488889±3697447 |
| EG | SC | 14 d | 1600 ±1149 |
| PG | SC | 14 d | 5378 ±1733 |
| Nys | SC | 14 d | 178±291 |
| Pri | ATCC | 14 d | 32622222±4331795 |
| EG | ATCC | 14 d | 1333 ±600 |
| PG | ATCC | 14 d | 3778±1525 |
| Nys | ATCC | 14 d | 356±371 |

Pri= primer only(without material or drug)*;* EG= *E. giganteum*; PG= *P. granatum*; Nys= Nystatin
